# Supplementary material for: Aberrant HSF1 signaling activation underlies metformin amelioration of myocardial infarction in mice
Source: PubMed Central journal article supplement — Mol Ther Nucleic Acids. 2022 Jul 11;29:312–28. doi: 10.1016/j.omtn.2022.07.009 (PMC9352811; doi:10.1016/j.omtn.2022.07.009), 2022-07-11
Supplement: mmc1.pdf [file mmc1.pdf]

OMTN, Volume 29

## **Supplemental information**

### **Aberrant HSF1 signaling activation underlies metformin amelioration of myocardial infarction in mice**

**Mingyuan Wang, Jiang Zou, Jinjin Wang, Meidong Liu, Ke Liu, Nian Wang, and Kangkai Wang**

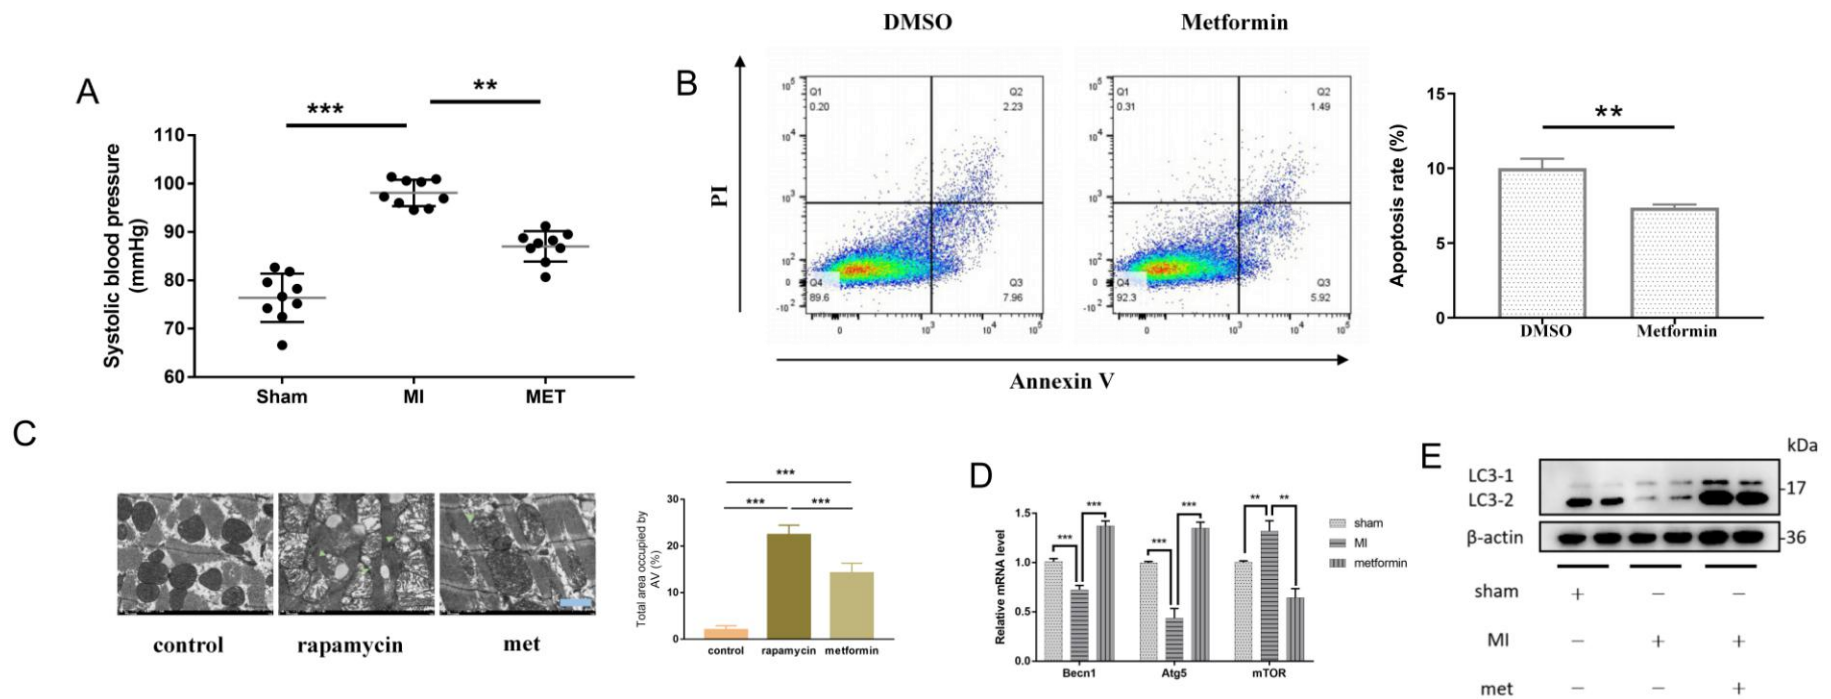

### supplementary figure 1

(A) 14 days after the operation, the systolic blood pressure of the mice was compared between the sham operation group, the operation control group and the metformin treatment group. (n=9; SD; \*\* p < 0.01 and \*\*\* p < 0.001)

(B) Basic apoptosis rate of mouse primary cardiomyocytes between control group and metformin treatment group. (n=3; \*\*p < 0.01)

(C) Transmission electron microscope representative pictures of the tissues adjacent to the infarcted myocardium in the untreated control group, rapamycin (positive control) group and metformin treatment group. Arrows show autophagosomes. Quantitative statistics of autophagic vesicles per unit area. (n=6; Bar=500nm)

(D) Real-time quantitative PCR was used to detect the mRNA expression levels of autophagy-related genes Becl 1, Atg 5 and mTOR in the myocardial tissue of the sham operation group and the tissues adjacent to the infarction in the operation group and metformin treatment group. (n=3; SD; \*\* p <0.01 and \*\*\* p <0.001)

(E) Western blotting was used to detect the levels of autophagy-related protein LC3II/I in the myocardial tissue of the sham operation group and the tissues adjacent to the infarction in the operation group and metformin treatment group.

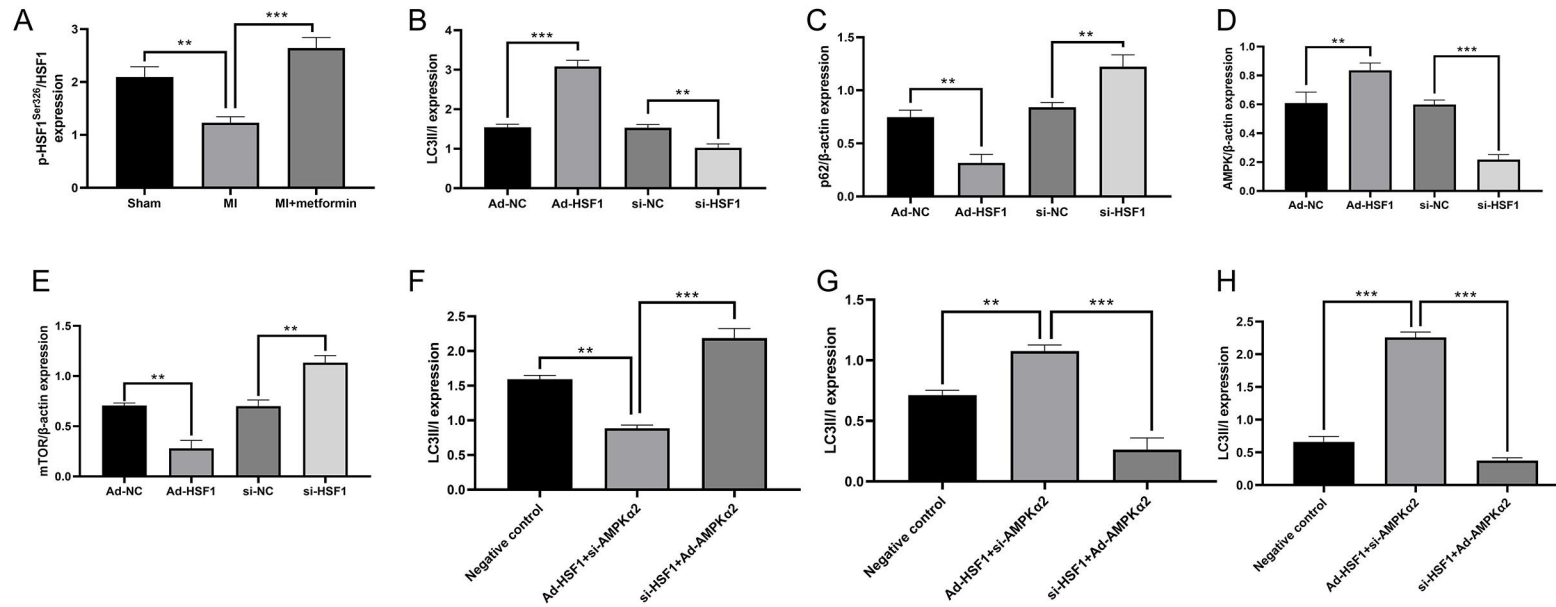

**supplementary figure 2**

(A-B) Western blot statistical histogram of figure 2A.

(C-E) Western blot statistical histogram of figure 4D.

(F-H) Western blot statistical histogram of figure 4F.

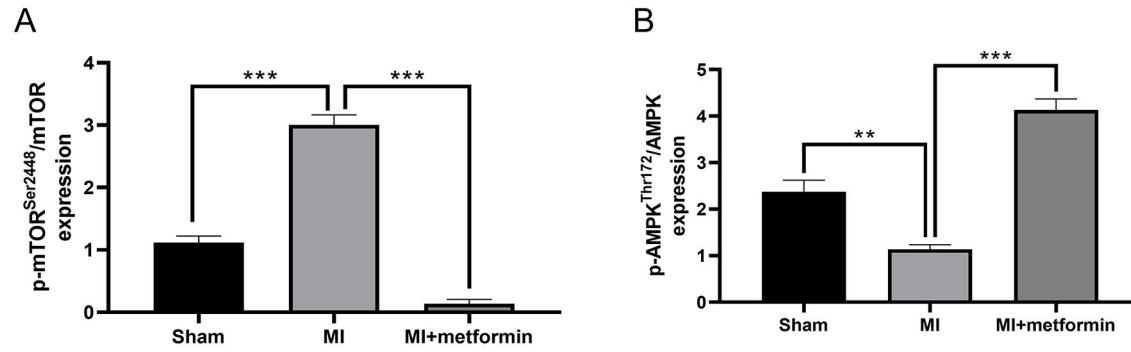

**supplementary figure 3**

Western blot statistical histogram of figure 6A

### Supplementary Table 1: The primer sequence of qPCR

| Primer | Forward (5'→3')        | Reverse (5'→3')         |
|--------|------------------------|-------------------------|
| Becl1  | ATGGAGGGGTCTAAGGCGTC   | TGGGCTGTGGTAAGTAATGGA   |
| Atg5   | TGTGCTTCGAGATGTGTGGTT  | ACCAACGTCAAATAGCTGACTC  |
| mTOR   | CAGTTCGCCAGTGGACTGAAG  | GCTGGTCATAGAAGCGAGTAGAC |
| Hsf1   | GGGAAACAGGAGTGTATGGACT | CTTGTTGACAACTTTTTGCTGCT |
| Prkaa2 | AAGATCGGACACTACGTCCTG  | TGCCACTTTATGGCCTGTCAA   |
| Mtor   | CAGTTCGCCAGTGGACTGAAG  | GCTGGTCATAGAAGCGAGTAGAC |
| Actb   | GTGACGTTGACATCCGTAAGA  | GCCGGACTCATCGTACTCC     |

**Supplementary Table 2: si-RNA sequence information**

| gene   | Target   | target sequence            | RNA oligo sequences                            |
|--------|----------|----------------------------|------------------------------------------------|
| symbol | position | 21nt target + 2nt overhang | 21nt guide (5'→3')<br>21nt passenger (5'→3')   |
| Hsf1   | 473-495  | CCGAAAAGTAGTCCACATTGAGC    | UCAAUGUGGACUACUUUUCGG<br>GAAAAGUAGUCCACAUUGAGC |
| Prkaa2 | 216-238  | GACAGACTTTTTTATGGTAATGG    | AUUACCAUAAAAAAGUCUGUC<br>CAGACUUUUUAUGGUA AUGG |

**Supplementary Table 3: SPR experimental method design and parameters**

|                                      |                                                                                 |
|--------------------------------------|---------------------------------------------------------------------------------|
| <b>Analysis Project</b>              | HSF1-metformin and AMPK-metformin                                               |
| <b>Buffer</b>                        | PBST(pH = 7.4, 0.1% Tween 20)                                                   |
| <b>Regeneration buffer</b>           | Glycine-HCl (pH = 2.0)                                                          |
| <b>Analyte concentration</b>         | 200nM, 400nM, 800nM, 1600nM, 3200nM                                             |
| <b>Analyte injection speed</b>       | 0.5 $\mu$ L/s                                                                   |
| <b>Binding time</b>                  | 600s                                                                            |
| <b>Dissociation time</b>             | 360s                                                                            |
| <b>Regeneration buffer flow rate</b> | 2 $\mu$ L/s                                                                     |
| <b>Regeneration time</b>             | 300s                                                                            |
| <b>Binding reaction temperature</b>  | 4°C                                                                             |
| <b>Chip selection</b>                | Photo-cross-linker SensorCHIP™                                                  |
| <b>Test conditions</b>               | Humidity: 11.96 %; Temperature: 4.00 °C; N <sub>2</sub> atmosphere (1.025 ATMs) |
| <b>Loading apparatus</b>             | Biodot AD-1520 Array Printer                                                    |
| <b>Analytical equipment</b>          | Berthold bScreen LB 991                                                         |
